# Supplementary material for: A comprehensive mechanosensory connectome reveals a somatotopically organized neural circuit architecture controlling stimulus-aimed grooming of the Drosophila head
Source: eLife. 2026 Jun 8;14:RP108044. doi: 10.7554/eLife.108044 (PMC13246004; doi:10.7554/eLife.108044)
Supplement: Figure 12—figure supplement 2—source data 1. [file elife-108044-fig12-figsupp2-data1.xlsx]

## Sheet: Figure 12 source data
Main category	Subcategory	Category	Partners n	Partners %	Synapses n	Synapses %	Notes
Interneuron & Descending	Hemilineage	LB23	31	7.2	7865	12.02
Interneuron & Descending	Hemilineage	LB7__prim	18	4.2	2199	3.36
Interneuron & Descending	Hemilineage	MX3	15	3.5	1409	2.15
Interneuron & Descending	Hemilineage	MX12	13	3	129	0.2
Interneuron & Descending	Hemilineage	MD3	10	2.3	912	1.39
Interneuron & Descending	Hemilineage	MD_SA1	7	1.6	249	0.38
Interneuron & Descending	Hemilineage	MX12__prim	6	1.4	195	0.3
Interneuron & Descending	Hemilineage	WEDa1/BAlv	5	1.2	433	0.66
Interneuron & Descending	Hemilineage	LB7	3	0.7	233	0.36
Interneuron & Descending	Hemilineage	LB0_anterior	3	0.7	43	0.07
Interneuron & Descending	Hemilineage	ALLv1/BAlp4	2	0.5	24	0.04
Interneuron & Descending	Hemilineage	MX7__prim	2	0.5	12	0.02
Interneuron & Descending	Hemilineage	CREa1_ventral / BAmd1_ventral	1	0.2	5	0.01
Interneuron & Descending	Hemilineage	LB19	1	0.2	11	0.02
Interneuron & Descending	Hemilineage	MX0__prim	1	0.2	5	0.01
Interneuron & Descending	Hemilineage	TRDl_b	1	0.2	7	0.02
Interneuron & Descending	Hemilineage	VESa1 / BAla3	1	0.2	5	0.01
Interneuron & Descending	Hemilineage	VLPa1_lateral / DALl2_lateral	1	0.2	5	0.01
Interneuron & Descending	Hemilineage	WEDd1/DALd	1	0.2	29	0.04
Interneuron & Descending	Putative primary	Putative primary	163	37.7	38818	59.35
Interneuron & Descending	No hemilineage	No hemilineage	12	2.8	1822	2.79
Interneuron & Descending	Hemilineage subtotal	Hemilineage subtotal	297	68.8	54410	83.18	Subtotal shown in merged cells in original figure
BMN		BMN	62	14.4	584	0.89
Ascending		Ascending	57	13.2	8904	13.61
Motor		Motor	16	3.7	1511	2.31
Total		Total	432	100	65409	100
