# Supplementary material for: A comprehensive mechanosensory connectome reveals a somatotopically organized neural circuit architecture controlling stimulus-aimed grooming of the Drosophila head
Source: eLife. 2026 Jun 8;14:RP108044. doi: 10.7554/eLife.108044 (PMC13246004; doi:10.7554/eLife.108044)
Supplement: Supplementary file 7. — Numbers of BMNs of each type that are connected with each motor neuron, used to generate Figure 4C. Also, calculated percentages of the total motor neuron synaptic inputs from each BMN type used to generate Figure 4—figure supplement 1. [file elife-108044-supp7.xlsx]

## Sheet: Sheet1
			These based on earlier codex	These all based on Codex v783
Neuron annotation	unique_pre_post	partner-name	BM_Taste	BM_Hau	BM_Ant	BM_Fr	BM_Or	BM_Oc	BM_Vt_PoOC
Proboscis motor neuron/MN in compound labial nerve	720575940633185567	unclassified_motor_neuron_FW_007	366
Proboscis motor neuron/MN in compound labial nerve	720575940621586854	unclassified_motor_neuron_FW_009	336
Proboscis motor neuron/MN in compound labial nerve	720575940623352063	unclassified_motor_neuron_FW_015	45
Proboscis motor neuron/MN in compound labial nerve	720575940618600246	unclassified_motor_neuron_FW_005	12
Proboscis motor neuron/MN in compound labial nerve/Motor neuron 2 ventral (MN2V)	720575940619682368	unclassified_motor_neuron_FW_017	8
Proboscis motor neuron/MN in compound labial nerve	720575940614386070	unclassified_motor_neuron_FW_002	5
Proboscis motor neuron/MN in compound labial nerve	720575940616340639	unclassified_motor_neuron_FW_006	5
Proboscis motor neuron/MN in pharyngeal nerve	720575940610679876	unclassified_motor_neuron_FW_001	159	34
Proboscis motor neuron/MN in pharyngeal nerve	720575940644726432	unclassified_motor_neuron_FW_011	130	44
Proboscis motor neuron/MN in pharyngeal nerve	720575940630580854	unclassified_motor_neuron_FW_010	53	36
Proboscis motor neuron/MN in pharyngeal nerve	720575940647474979	unclassified_motor_neuron_FW_013	51	5	12
Proboscis motor neuron/MN in pharyngeal nerve	720575940623390246	unclassified_motor_neuron_FW_014	39	5
Proboscis motor neuron/MN in pharyngeal nerve	720575940626939737	unclassified_motor_neuron_FW_016	15	5
Proboscis motor neuron/MN in pharyngeal nerve	720575940615197747	unclassified_motor_neuron_FW_003	9
unclassified_IN_FW_151	720575940621351412	unclassified_motor_neuron_FW_008			110		35	15	11
SH_unclassified_IN_31	720575940611008718	unclassified_motor_neuron_FW_012			150	18	53	40	13
Neuron annotation	unique_pre_post	partner-name	Total motor neuron synapses	BM_Taste	BM_Hau	BM_Ant	BM_Fr	BM_Or	BM_Oc	BM_Vt_PoOC
Proboscis motor neuron/MN in compound labial nerve	720575940633185567	unclassified_motor_neuron_FW_007	6246	5.85975	0	0	0	0	0	0
Proboscis motor neuron/MN in compound labial nerve	720575940621586854	unclassified_motor_neuron_FW_009	5490	6.12022	0	0	0	0	0	0
Proboscis motor neuron/MN in compound labial nerve	720575940623352063	unclassified_motor_neuron_FW_015	4692	0.959079	0	0	0	0	0	0
Proboscis motor neuron/MN in compound labial nerve	720575940618600246	unclassified_motor_neuron_FW_005	1869	0.642055	0	0	0	0	0	0
Proboscis motor neuron/MN in compound labial nerve/Motor neuron 2 ventral (MN2V)	720575940619682368	unclassified_motor_neuron_FW_017	1878	0.425985	0	0	0	0	0	0
Proboscis motor neuron/MN in compound labial nerve	720575940614386070	unclassified_motor_neuron_FW_002	1969	0.253936	0	0	0	0	0	0
Proboscis motor neuron/MN in compound labial nerve	720575940616340639	unclassified_motor_neuron_FW_006	1630	0.306748	0	0	0	0	0	0
Proboscis motor neuron/MN in pharyngeal nerve	720575940610679876	unclassified_motor_neuron_FW_001	3485	4.56241	0.97561	0	0	0	0	0
Proboscis motor neuron/MN in pharyngeal nerve	720575940644726432	unclassified_motor_neuron_FW_011	4112	3.16148	1.07004	0	0	0	0	0
Proboscis motor neuron/MN in pharyngeal nerve	720575940630580854	unclassified_motor_neuron_FW_010	1795	2.95265	2.00557	0	0	0	0	0
Proboscis motor neuron/MN in pharyngeal nerve	720575940647474979	unclassified_motor_neuron_FW_013	1919	2.65763	0.260552	0.625326	0	0	0	0
Proboscis motor neuron/MN in pharyngeal nerve	720575940623390246	unclassified_motor_neuron_FW_014	1065	3.66197	0.469484	0	0	0	0	0
Proboscis motor neuron/MN in pharyngeal nerve	720575940626939737	unclassified_motor_neuron_FW_016	1173	1.27877	0.426257	0	0	0	0	0
Proboscis motor neuron/MN in pharyngeal nerve	720575940615197747	unclassified_motor_neuron_FW_003	5327	0.168951	0	0	0	0	0	0
unclassified_IN_FW_151	720575940621351412	unclassified_motor_neuron_FW_008	1751	0	0	6.28212	0	1.99886	0.856653	0.628212
SH_unclassified_IN_31	720575940611008718	unclassified_motor_neuron_FW_012	2613	0	0	5.74053	0.688863	2.02832	1.53081	0.497512
Used for panel C
Number of BMNs of each type connected with motor neurons. Numbers were obtained for each motor neuron in Codex (v783). The next three plots include BMNs from the left side of the head
Neuron annotation	unique_pre_post	partner-name	partner_NT	BM_Taste	BM_Hau	BM_Ant	BM_Fr	BM_Or	BM_Oc	BM_Vt_PoOC
Proboscis motor neuron/MN in compound labial nerve	720575940633185567	unclassified_motor_neuron_FW_007	GABA	18
Proboscis motor neuron/MN in compound labial nerve	720575940621586854	unclassified_motor_neuron_FW_009	Ach	22
Proboscis motor neuron/MN in compound labial nerve	720575940623352063	unclassified_motor_neuron_FW_015	Unknown	6
Proboscis motor neuron/MN in compound labial nerve	720575940618600246	unclassified_motor_neuron_FW_005	Unknown	2
Proboscis motor neuron/MN in compound labial nerve/Motor neuron 2 ventral (MN2V)	720575940619682368	unclassified_motor_neuron_FW_017	Unknown	1
Proboscis motor neuron/MN in compound labial nerve	720575940614386070	unclassified_motor_neuron_FW_002	Unknown	1
Proboscis motor neuron/MN in compound labial nerve	720575940616340639	unclassified_motor_neuron_FW_006	Unknown	1
Proboscis motor neuron/MN in pharyngeal nerve	720575940610679876	unclassified_motor_neuron_FW_001	Unknown	13	2
Proboscis motor neuron/MN in pharyngeal nerve	720575940644726432	unclassified_motor_neuron_FW_011	Unknown	8	2
Proboscis motor neuron/MN in pharyngeal nerve	720575940630580854	unclassified_motor_neuron_FW_010	Unknown	5	4
Proboscis motor neuron/MN in pharyngeal nerve	720575940647474979	unclassified_motor_neuron_FW_013	Unknown	5	1	1
Proboscis motor neuron/MN in pharyngeal nerve	720575940623390246	unclassified_motor_neuron_FW_014	Unknown	4	1
Proboscis motor neuron/MN in pharyngeal nerve	720575940626939737	unclassified_motor_neuron_FW_016	Ach	2	1
Proboscis motor neuron/MN in pharyngeal nerve	720575940615197747	unclassified_motor_neuron_FW_003	Ach	1
unclassified_IN_FW_151	720575940621351412	unclassified_motor_neuron_FW_008	Unknown			7		2	1	2
SH_unclassified_IN_31	720575940611008718	unclassified_motor_neuron_FW_012	Unknown			3	0	1	2	1
