# Supplementary material for: A comprehensive mechanosensory connectome reveals a somatotopically organized neural circuit architecture controlling stimulus-aimed grooming of the Drosophila head
Source: eLife. 2026 Jun 8;14:RP108044. doi: 10.7554/eLife.108044 (PMC13246004; doi:10.7554/eLife.108044)
Supplement: Supplementary file 14. — Table of BMN postsynaptic and pre/post partners along with the hemilineage information. Provides additional information regarding total number of neurons within each hemilineage population and the proportion of these neurons that are postsynaptic targets of BMNs. [file elife-108044-supp14.xlsx]

## Sheet: REVISED_Presynaptic_connectivit
Name (Ito Lee / Hartenstein)	Neurotransmitter	# BMN presynaptic partners per side								# total neurons in hemilineage per side				% connectivity of BMN presynaptic partners to whole hemilineage per side		% connectivity of BMN presynaptic partners to whole hemilineage (both sides)	% connectivity of hemilineage to total BMNs presynaptic partners	% connectivity of hemilineage to total BMNs INTER + DESCENDING (ALL) postsynaptic partners	% connectivity of hemilineage to total BMNs INTER + DESCENDING (HEMILINEAGE) postsynaptic partners			ALL BMN presynaptic partners
		Left		TOTAL	Right		TOTAL	TOTAL (BOTH SIDES)	TOTAL (all)	Left	Right	TOTAL	TOTAL (all)	Left	Right
		Interneurons	Descending neurons		Interneurons	Descending neurons																Interneurons	Descending neurons	Ascending neurons	BMNs	JOs	TOTAL
MX3	GABA	0	1	1	0	0	0	1	1	124	122	246	246	0.806452	0	0.406504	1.92308	16.6667	33.3333		TOTAL	2	4	21	24	1	52
MD3	GABA	0	1	1	0	1	1	2	2	126	125	251	251	0.793651	0.8	0.796813	3.84615	33.3333	66.6667			ONLY hemilineages	3
Putative primary	GABA	1	1	2	1	0	1	3	3	1698	1667	3365	3365	0.117786	0.059988	0.089153	5.76923	50	100			All groups	6
Ascending neurons	GABA	8			6			14	21								40.3846	100
	Ser	3			3			6
	Glut	1			0			1
BMNs	ACh	2			21			23	24								46.1538
	Glut	0			1			1
JOs	ACh	1			0			1	1								1.92308
				19			33		52								100
							TOTAL	INTER	2
								DESCENDING	4
								INTER, DESC, ASC	27
								ALL PARTNERS	52
INCLUDING PRE&POST
Name (Ito Lee / Hartenstein)	Neurotransmitter	# BMN pre + pre/postsynaptic partners per side								# total neurons in hemilineage per side				% connectivity of BMN presynaptic partners to whole hemilineage per side		% connectivity of BMN presynaptic partners to whole hemilineage (both sides)	% connectivity of hemilineage to total BMNs presynaptic partners	% connectivity of hemilineage to total BMNs INTER + DESCENDING (ALL) postsynaptic partners	% connectivity of hemilineage to total BMNs INTER + DESCENDING (HEMILINEAGE) postsynaptic partners
		Left		TOTAL	Right		TOTAL	TOTAL (BOTH SIDES)	TOTAL (all)	Left	Right	TOTAL	TOTAL (all)	Left	Right
		Interneurons	Descending neurons		Interneurons	Descending neurons																ALL BMN presynaptic partners
LB23	ACh	0	0	0	0	1	1	1	1	22	21	43	43	0	4.7619	2.32558	0.8	3.125	9.09091
MX3	GABA	0	5	5	0	3	3	8	8	124	122	246	246	4.03226	2.45902	3.25203	6.4	25	72.7273			Interneurons	Descending neurons	Ascending neurons	BMNs	JOs	TOTAL
MD3	GABA	0	1	1	0	1	1	2	2	126	125	251	251	0.793651	0.8	0.796813	1.6	6.25	18.1818		TOTAL	20	12	34	58	1	125
Putative primary	GABA	10	1	11	10	0	10	21	21	1698	1667	3365	3365	0.647821	0.59988	0.624071	16.8	65.625	100			ONLY hemilineages	11
Ascending neurons	GABA	12			15			27	34								27.2	100				All groups	32
	Ser	3			3			6
	Glut	1			0			1
BMNs	ACh	2			55			57	58								46.4
	Glut	0			1			1
JOs	ACh	1			0			1	1								0.8
				36			89		125								100
							TOTAL	INTER	20
								DESCENDING	12
								INTER, DESC, ASC	66
								ALL PARTNERS	125

## Sheet: REVISED_Pre&Post_connectivity_R
`12
Name (Ito Lee / Hartenstein)	Neurotransmitter	# BMN pre/postsynaptic partners per side								# total neurons in hemilineage per side				% connectivity of BMN presynaptic partners to whole hemilineage per side		% connectivity of BMN presynaptic partners to whole hemilineage (both sides)	% connectivity of hemilineage to total BMNs presynaptic partners	% connectivity of hemilineage to total BMNs INTER + DESCENDING (ALL) postsynaptic partners	% connectivity of hemilineage to total BMNs INTER + DESCENDING (HEMILINEAGE) postsynaptic partners			ALL BMN presynaptic partners
		Left		TOTAL	Right		TOTAL	TOTAL (BOTH SIDES)	TOTAL (all)	Left	Right	TOTAL	TOTAL (all)	Left	Right
		Interneurons	Descending neurons		Interneurons	Descending neurons																Interneurons	Descending neurons	Ascending neurons	BMNs	TOTAL
LB23	ACh	0	0	0	0	1	1	1	1	22	21	43	43	0	4.7619	2.32558	1.36986	3.84615	12.5		TOTAL	18	8	13	34	73
MX3	GABA	0	4	4	0	3	3	7	7	124	122	246	246	3.22581	2.45902	2.84553	9.58904	26.9231	87.5			ONLY hemilineages	8
Putative primary	GABA	9	0	9	9	0	9	18	18	1698	1667	3365	3365	0.530035	0.539892	0.534918	24.6575	69.2308	100			All groups	26
Ascending neurons	GABA	4			9			13	13								17.8082	100
BMNs	ACh	0			34			34	34								46.5753
				17			56		73								100
							TOTAL	INTER	18
								DESCENDING	8
								INTER, DESC, ASC	73
								ALL PARTNERS	73

## Sheet: REVISED_Postsynaptic_connectivi
Name (Ito Lee / Hartenstein)	Neurotransmitter	# BMN postsynaptic partners per side								# total neurons in hemilineage per side				% connectivity of BMN postsynaptic partners to whole hemilineage per side		% connectivity of BMN postsynaptic partners to whole hemilineage (both sides)	% connectivity of hemilineage to total BMNs postsynaptic partners	% connectivity of hemilineage to total BMNs INTER + DESCENDING (ALL) postsynaptic partners	% connectivity of hemilineage to total BMNs INTER + DESCENDING (HEMILINEAGE) postsynaptic partners			ALL BMN postsynaptic partners
		Left		TOTAL	Right		TOTAL	TOTAL (BOTH SIDES)	TOTAL (all)	Left	Right	TOTAL	TOTAL (all)	Left	Right
		Interneurons	Descending neurons		Interneurons	Descending neurons																Interneurons	Descending neurons	Ascending neurons	Motor neurons	BMNs	TOTAL
LB23	ACh	7	3	10	18	2	20	30	30	22	21	43	43	45.4545	95.2381	69.7674	8.35655	11.0701	26.3158		TOTAL	181	90	44	16	28	359
ALlv1 / BAlp4	ACh	0	0	0	2	0	2	2	2	76	80	156	156	0	2.5	1.28205	0.557103	0.738007	1.75439			ONLY hemilineages	114
CREa1_ventral / BAmd1_ventral	GABA	1	0	1	0	0	0	1	1	49	48	97	97	2.04082	0	1.03093	0.278552	0.369004	0.877193			All groups	271
LB19	ACh	0	0	0	1	0	1	1	1	55	54	109	109	0	1.85185	0.917431	0.278552	0.369004	0.877193
MX12__prim	ACh	1	1	2	3	0	3	5	6	13	12	25	44	15.3846	25	13.6364	1.67131	2.21402	5.26316
	GABA	0	0	0	0	0	0	0		1	2	3		0	0
	Glut	0	0	0	0	1	1	1		8	8	16		0	12.5
LB7__prim	ACh	1	4	5	2	6	8	13	18	19	19	38	46	26.3158	42.1053	39.1304	5.01393	6.64207	15.7895
	GABA	0	0	0	1	0	1	1		2	2	4		0	50
	Glut	2	0	2	2	0	2	4		2	2	4		100	100
LB0_anterior	GABA	3	---	3	---			3	3	57		57	57	5.26316		5.26316	0.835655	1.10701	2.63158
LB7	GABA	1	0	1	2	0	2	3	3	80	81	161	161	1.25	2.46914	1.86335	0.835655	1.10701	2.63158
MD3	GABA	2	1	3	3	2	5	8	10	127	125	252	252	3.14961	4.8	3.96825	2.78552	3.69004	8.77193
	Unknown	0	1	1	0	1	1	2
MX0__prim	DA	1	---	1	---			1	1	22		22	22	4.54545		4.54545	0.278552	0.369004	0.877193
MX3	GABA	2	1	3	5	0	5	8	8	124	122	246	246	2.41935	4.09836	3.25203	2.22841	2.95203	7.01754
WEDa1 / BAlv	GABA	0	0	0	5	0	5	5	5	82	83	165	165	0	6.0241	3.0303	1.39276	1.84502	4.38596
MD_SA1	Glut	0	0	0	7	0	7	7	7	36	39	75	75	0	17.9487	9.33333	1.94986	2.58303	6.14035
MX7__prim	ACh	0	0	0	0	2	2	2	2	8	8	16	24	0	25	3.25203	0.557103	0.738007	1.75439
	GABA	0	0	0	0	0	0	0		1	1	2		0	0
	Glut	0	0	0	0	0	0	0		3	3	6		0	0
MX12	ACh	0	2	2	0	11	11	13	13	46	48	94	94	4.34783	22.9167	13.8298	3.62117	4.79705	11.4035
TRdl_b	ACh	0	0	0	1	0	1	1	1	65	61	126	126	0	1.63934	0.793651	0.278552	0.369004	0.877193
VESa1 / BAla3	GABA	0	0	0	1	0	1	1	1	36	37	73	73	0	2.7027	1.36986	0.278552	0.369004	0.877193
VLPa1_lateral / DALl2_lateral	ACh	0	0	0	1	0	1	1	1	82	82	164	164	0	1.21951	0.609756	0.278552	0.4	0.877193
WEDd1 / DALd	ACh	0	0	0	0	1	1	1	1	98	98	196	196	0	1.02041	0.510204	0.278552	0.369004	0.877193
Putative primary	ACh	15	12	27	25	16	41	68	145	1698	1667	3365	3365	3.2391	5.39892	4.30906	40.39	53.5055	100
	GABA	13	7	20	33	5	38	58
	Glut	4	1	5	6	2	8	13
	Unknown	1	2	3	2	1	3	6
NO HEMILINEAGE	ACh	2	1	3	3	2	5	8	12				0				3.34262	4.42804
	GABA	0	0	0	2	1	3	3
	Unknown	0	0	0	0	1	1	1					0
				92			178		271								75.4875	100.031
Other neuronal types
Motor neurons (putative primary)	ACh	1			2			3	16								4.45682
	GABA	0			1			1
	Unknown	2			10			12				0
Ascending neurons	ACh	11			21			32	44								12.2563
	GABA	1			3			4
	Glut	1			1			2
	Unknown	2			4			6
BMNs	ACh	9			17			26	28								7.79944
	Unknown	0			2			2
				26			58		72								100
							TOTAL	INTER	181
								DESCENDING	90
								INTER, DESC, ASC	315
								ALL PARTNERS	343

## Sheet: REVISED_Post_and_PrePost_connec
INCLUDING PRE&POST
Name (Ito Lee / Hartenstein)	Neurotransmitter	# BMN post + pre/postsynaptic partners per side								# total neurons in hemilineage per side				% connectivity of BMN postsynaptic partners to whole hemilineage per side		% connectivity of BMN postsynaptic partners to whole hemilineage (both sides)	% connectivity of hemilineage to total BMNs postsynaptic partners	% connectivity of hemilineage to total BMNs INTER + DESCENDING (ALL) postsynaptic partners	% connectivity of hemilineage to total BMNs INTER + DESCENDING (HEMILINEAGE) postsynaptic partners			ALL BMN postsynaptic partners
		Right		TOTAL	Left		TOTAL	TOTAL (BOTH SIDES)	TOTAL (all)	Left	Right	TOTAL	TOTAL (all)	Left	Right
		Interneurons	Descending neurons		Interneurons	Descending neurons																Interneurons	Descending neurons	Ascending neurons	Motor neurons	BMNs	TOTAL
LB23	ACh	7	3	10	18	3	21	31	31	22	21	43	43	45.4545	100	72.093	7.17593	10.4377	25.4098		TOTAL	199	98	57	16	62	432
ALlv1 / BAlp4	ACh	0	0	0	2	0	2	2	2	76	80	156	156	0	2.5	1.28205	0.462963	0.673401	1.63934			ONLY hemilineages	122
CREa1_ventral / BAmd1_ventral	GABA	1	0	1	0	0	0	1	1	49	48	97	97	2.04082	0	1.03093	0.231481	0.3367	0.819672			All groups	297
LB19	ACh	0	0	0	1	0	1	1	1	55	54	109	109	0	1.85185	0.917431	0.231481	0.3367	0.819672
MX12__prim	ACh	1	1	2	3	0	3	5	6	13	12	25	44	15.3846	25	13.6364	1.38889	2.0202	4.91803
	GABA	0	0	0	0	0	0	0		1	2	3		0	0
	Glut	0	0	0	0	1	1	1		8	8	16		0	12.5
LB7__prim	ACh	1	4	5	2	6	8	13	18	19	19	38	46	26.3158	42.1053	39.1304	4.16667	6.06061	14.7541
	GABA	0	0	0	1	0	1	1		2	2	4		0	50
	Glut	2	0	2	2	0	2	4		2	2	4		100	100
LB0_anterior	GABA	3	---	3	---			3	3	57		57	57	5.26316		5.26316	0.694444	1.0101	2.45902
LB7	GABA	1	0	1	2	0	2	3	3	80	81	161	161	1.25	2.46914	1.86335	0.694444	1.0101	2.45902
MD3	GABA	2	1	3	3	2	5	8	10	127	125	252	252	3.14961	4.8	3.96825	2.31481	3.367	8.19672
	Unknown	0	1	1	0	1	1	2
MX0__prim	DA	1	---	1	---			1	1	22		22	22	4.54545		4.54545	0.231481	0.3367	0.819672
MX3	GABA	2	5	7	5	3	8	15	15	124	122	246	246	5.64516	6.55738	6.09756	3.47222	5.05051	12.2951
WEDa1 / BAlv	GABA	0	0	0	5	0	5	5	5	82	83	165	165	0	6.0241	3.0303	1.15741	1.6835	4.09836
MD_SA1	Glut	0	0	0	7	0	7	7	7	36	39	75	75	0	17.9487	9.33333	1.62037	2.3569	5.7377
MX7__prim	ACh	0	0	0	0	2	2	2	2	8	8	16	24	0	25	8.33333	0.462963	0.673401	1.63934
	GABA	0	0	0	0	0	0	0		1	1	2		0	0
	Glut	0	0	0	0	0	0	0		3	3	6		0	0
MX12	ACh	0	2	2	0	11	11	13	13	46	48	94	94	4.34783	22.9167	13.8298	3.00926	4.3771	10.6557
TRdl_b	ACh	0	0	0	1	0	1	1	1	65	61	126	126	0	1.63934	0.793651	0.231481	0.3367	0.819672
VESa1 / BAla3	GABA	0	0	0	1	0	1	1	1	36	37	73	73	0	2.7027	1.36986	0.231481	0.3367	0.819672
VLPa1_lateral / DALl2_lateral	ACh	0	0	0	1	0	1	1	1	82	82	164	164	0	1.21951	0.609756	0.231481	0.3367	0.819672
WEDd1 / DALd	ACh	0	0	0	0	1	1	1	1	98	98	196	196	0	1.02041	0.510204	0.231481	0.3367	0.819672
Putative primary	ACh	15	12	27	25	16	41	68	163	1698	1667	3365	3365	1.59011	2.45951	4.84398	37.7315	54.8822	100
	GABA	22	7	29	42	5	47	76
	Glut	4	1	5	6	2	8	13
	Unknown	1	2	3	2	1	3	6
NO HEMILINEAGE	ACh	2	1	3	3	2	5	8	12				0				2.77778	4.0404
	GABA	0	0	0	2	1	3	3
	Unknown	0	0	0	0	1	1	1					0
				105			191		297								68.75	100
Other neuronal types
Motor neurons (putative primary)	ACh	1			2			3	16								3.7037
	GABA	0			1			1
	Unknown	2			10			12				0
Ascending neurons	ACh	11			21			32	57								13.1944
	GABA	5			12			17
	Glut	1			1			2
	Unknown	2			4			6
BMNs	ACh	9			51			60	62								14.3519
	Unknown	0			2			2
				30			101		119								100
							TOTAL	INTER	199
								DESCENDING	98
								INTER, DESC, ASC	354
								ALL PARTNERS	416

## Sheet: Synapse_count
SYNAPSE COUNT
PRESYNAPTIC
		ACh	Glut	GABA	Ser
BMN		138	5
JON		5
Ascending			5	1611	125
Descending				137
Interneuron				19
PRE & POSTSYNAPTIC
		ACh	GABA
BMN		405
Descending		23	1480
Interneuron			17669
Ascending			2522
POSTSYNAPTIC
		ACh	GABA	Glut	DA	Unknown
Interneuron	Hemilineage	3787	1614	84	5
	No hemilineage	814	27
	Putative primary	4810	6214	1694		854
Descending	Hemilineage	5045	251	7		433
	No hemilineage	781	189			11
	Putative primary	11231	2073	267
Ascending		6382	596	459
BMN		163			10
Motor		365	366			780
POST + PRE/POST
		ACh	GABA	Glut	DA	Unknown
Interneuron	Hemilineage	3787	1614	84	5
	No hemilineage	814	27
	Putative primary	4810	15226	1694		854
Descending	Hemilineage	6817	1023	7		433
	No hemilineage	781	189			11
	Putative primary	11231	2073	267
Ascending		6382	596	459
BMN		163			10
Motor		365	366			780

## Sheet: Postsynaptic_RIGHT_side_BMNs
Name (Ito Lee / Hartenstein)	Neurotransmitter	# BMN postsynaptic partners per side								# total neurons in hemilineage per side				% connectivity of BMN postsynaptic partners to whole hemilineage per side		% connectivity of BMN postsynaptic partners to whole hemilineage (both sides)	% connectivity of hemilineage to total BMNs postsynaptic partners	% connectivity of hemilineage to total BMNs INTER + DESCENDING postsynaptic partners		ALL BMN postsynaptic partners
		Left		TOTAL	Right		TOTAL	TOTAL (BOTH SIDES)	TOTAL (all)	Left	Right	TOTAL	TOTAL (all)	Left	Right
		Interneurons	Descending neurons		Interneurons	Descending neurons														Interneurons	Descending neurons	Ascending neurons	Motor neurons	TOTAL
LB23	ACh	7	2	9	16	3	19	28	28	22	21	43	43	40.9091	90.4762	65.1163	7.42706	24.5614		208	93	62	14	377
ALlv1 / BAlp4	ACh	0	0	0	2	0	2	2	2	76	80	156	156	0	2.5	1.28205	0.530504	1.75439		Total	301
LB19	ACh	0	0	0	2	0	2	2	2	55	54	109	109	0	3.7037	1.83486	0.530504	1.75439		ONLY hemilineages	114
MX12__prim	ACh	1	1	2	3	0	3	5	6	13	12	25	44	15.3846	25	13.6364	1.59151	5.26316
	GABA	0	0	0	0	0	0	0		1	2	3		0	0
	Glut	0	0	0	0	1	1	1		8	8	16		0	12.5
VLPa1_lateral / DALl2_lateral	ACh	0	0	0	1	0	1	1	1	82	82	164	164	0	1.21951	0.609756	0.265252	0.877193
LB7__prim	ACh	1	4	5	2	6	8	13	18	19	19	38	46	26.3158	42.1053	39.1304	4.77454	15.7895
	GABA	0	0	0	1	0	1	1		2	2	4		0	50
	Glut	2	0	2	2	0	2	4		2	2	4		100	100
LB0_anterior (center)	GABA	3	---	3	---			3	3	57		57	57	5.26316		5.26316	0.795756	2.63158
LB7	GABA	1	0	1	2	0	2	3	3	80	81	161	161	1.25	2.46914	1.86335	0.795756	2.63158
MD3	GABA	1	2	3	3	3	6	9	9	126	125	251	251	2.38095	4.8	3.58566	2.38727	7.89474
MX3	GABA	2	4	6	4	2	6	12	12	124	122	246	246	4.83871	4.91803	4.87805	3.18302	10.5263
VESa1 / BAla3	GABA	0	0	0	2	0	2	2	2	36	37	73	73	0	5.40541	2.73973	0.530504	1.75439
WEDa1 / BAlv	GABA	0	0	0	5	0	5	5	5	82	83	165	165	0	6.0241	3.0303	1.32626	4.38596
MD_SA1	Glut	0	0	0	8	0	8	8	8	36	41	77	77	0	19.5122	10.3896	2.12202	7.01754
MX7__prim	ACh	0	0	0	0	2	2	2	3	8	8	16	24	0	25	12.5	0.795756	2.63158
	GABA	0	0	0	0	0	0	0		1	1	2		0	0
	Glut	0	0	0	1	0	1	1		3	3	6		0	33.3333
MX12	ACh	0	0	0	0	10	10	10	10	46	48	94	94	0	20.8333	10.6383	2.65252	8.77193
TRdl_b	ACh	0	0	0	1	0	1	1	1	65	61	126	126	0	1.63934	0.793651	0.265252	0.877193
WEDd1 / DALd	ACh	0	0	0	0	1	1	1	1	98	98	196	196	0	1.02041	0.510204	0.265252	0.877193
Putative primary	ACh	20	15	35	26	18	44	79	173			0	3360			5.14881	45.8886	100
	GABA	22	5	27	46	4	50	77
	Glut	2	2	4	10	3	13	17
NO HEMILINEAGE	ACh	2	1	3	3	3	6	9	14			0	0				3.71353
	GABA	0	0	0	2	1	3	3				0	0
	Glut	0	0	0	2	0	2	2				0	0
				31			83		301								79.8408
Other neuronal types
Motor neurons (putative primary)	ACh	1			2			3	14			0	3502			0.0856653	3.71353
	GABA	0			1			1
	Unknown	1			9			10
Ascending neurons	ACh	13			22			35	62								16.4456
	GABA	7			16			23
	Glut	2			1			3
	Ser	0			1			1
									76								20.1592
									377								100

## Sheet: Postsynaptic_LEFT_side_BMNs
Name (Ito Lee / Hartenstein)	Neurotransmitter	# BMN postsynaptic partners per side								# total neurons in hemilineage per side				% connectivity of BMN postsynaptic partners to whole hemilineage per side		% connectivity of BMN postsynaptic partners to whole hemilineage (both sides)	% connectivity of hemilineage to total BMNs postsynaptic partners		ALL BMN postsynaptic partners
		Left		TOTAL	Right		TOTAL	TOTAL (BOTH SIDES)	TOTAL (all)	Left	Right	TOTAL	TOTAL (all)	Left	Right
		Interneurons	Descending neurons		Interneurons	Descending neurons													Interneurons	Descending neurons	TOTAL
LB23	ACh	14	3	17	7	1	8	25	25	21	21	42	42	80.9524	38.0952	59.5238	15.8228		98	60	158
LB19	ACh	0		0	1		1	1	1	55	54	109	109	0	1.85185	0.917431	0.632911
LB0_anterior (center)	GABA	4		4	0		0	4	4	57		57	57	7.01754		7.01754	2.53165
LB7__prim	ACh	1	4	5	1	0	1	6	7	19	19	38	42	26.3158	5.26316	16.6667	4.43038
	GABA	1		1	0		0	1		2	2	4		50	0
MX12__prim	ACh	1	1	2	1	0	1	3	3	13	12	25	25	15.3846	8.33333	12	1.89873
LB7	GABA	2		2	1		1	3	3	80	81	161	161	2.5	1.23457	1.86335	1.89873
MD3	GABA	1	2	3	0	1	1	4	4	126	125	251	251	2.38095	0.8	1.59363	2.53165
MX3	GABA	3	3	6	1	2	3	9	9	124	122	246	246	4.83871	2.45902	3.65854	5.6962
MD_SA1	ACh	1		1	0		0	1	1	36	41	77	77	2.77778	0	1.2987	0.632911
WEDa1 / BAlv	GABA	4		4	0		0	4	4	82	83	165	165	4.87805	0	2.42424	2.53165
WEDd1/DAld	ACh		1	1		0	0	1	1	98	98	196	196	1.02041	0	0.510204	0.632911
MX12	ACh		2	2		0	0	2	2	46	48	94	94	4.34783	0	2.12766	1.26582
Putative primary	ACh	8	17	25	4	7	11	36	87			0	3614			2.4073	55.0633
	GABA	20	5	25	15	4	19	44				0
	Glut	2	1	3	2	2	4	7				0
NO HEMILINEAGE	ACh	2	2	4	0	1	1	5	7			0	0				4.43038
	GABA	1	0	1	0	1	1	2				0	0
									158								100
