# Supplementary material for: A comprehensive mechanosensory connectome reveals a somatotopically organized neural circuit architecture controlling stimulus-aimed grooming of the Drosophila head
Source: eLife. 2026 Jun 8;14:RP108044. doi: 10.7554/eLife.108044 (PMC13246004; doi:10.7554/eLife.108044)
Supplement: Supplementary file 15. — Counts from the left and right brain hemispheres in nine individual brains of R40F04-GAL4 expressing mCD8::GFP. [file elife-108044-supp15.xlsx]

## Sheet: Sheet1
	40F04GAL4 cell count
number	left	right	Average
1	14	12	13	20120426_40F04_JFRC_20x_UAS_GFP_brain_1.lsm
2	12	12	12	20120426_40F04_JFRC_20x_UAS_GFP_brain_2.lsm
3	14	13	13.5	20120426_40F04_JFRC_20x_UAS_GFP_brain_3.lsm
4	14	13	13.5	04-17-13_L12_Sum.lsm
5	14	14	14	04-17-13_L14_Sum.lsm
6	14	15	14.5	04-17-13_L16_Sum.lsm
7	13	15	14	04-17-13_L18_Sum.lsm
8	14	15	14.5	04-17-13_L20_Sum.lsm
9	15	13	14	04-17-13_L22_Sum.lsm
		Average	13.6667
